# Supplementary material for: Distribution of triclosan-resistant genes in major pathogenic microorganisms revealed by metagenome and genome-wide analysis
Source: PLoS One. 2018 Feb 8;13(2):e0192277. doi: 10.1371/journal.pone.0192277 (PMC5805296; doi:10.1371/journal.pone.0192277)
Supplement: S8 Table — (XLSX) [file pone.0192277.s009.xlsx]

## Sheet: S8 Table 
S8 Table: Miseq Sequence Details of the TCS contaminated soil samples, used for microbiome analysis.
Soil sample Name	Remarks (Reference)	Initial Sequence Count	Feature	Material	Location	Country	Sequence Method	Quality filtered sequence count	average length (bp)	OTU hits
Alluvial Soil 1 (AS1)	TCS contaminated (7)	52895	Alluvial soil	Soil	Hadan dong, Busan	Republic of Korea	Illumina	26777	~580	11815
Alluvial Soil 2 (AS2)	TCS contaminated (7)	65028	Alluvial soil	Soil	Hadan dong, Busan	Republic of Korea	Illumina	35730	~580	15457
Industrially contaminated Soil 1 (ICS1)	TCS contaminated (7)	27073	Industrially contaminated soil	Soil	Sasang-Gu, Busan	Republic of Korea	Illumina	15212	~580	2538
Industrially contaminated Soil 2 (ICS2)	TCS contaminated (7)	88189	Industrially contaminated soil	Soil	Sasang-Gu, Busan	Republic of Korea	Illumina	48504	~580	27551
Reference;
7. Khan R, Kong HG, Jung YH, Choi J, Baek KY, Hwang EC, et al. Triclosan resistome from metagenome reveals diverse enoyl acyl carrier protein reductases and selective enrichment of triclosan resistance genes. Sci Rep. 2016;6: 32322.
