# Supplementary material for: Distribution of triclosan-resistant genes in major pathogenic microorganisms revealed by metagenome and genome-wide analysis
Source: PLoS One. 2018 Feb 8;13(2):e0192277. doi: 10.1371/journal.pone.0192277 (PMC5805296; doi:10.1371/journal.pone.0192277)
Supplement: S16 Table — (XLSX) [file pone.0192277.s017.xlsx]

## Sheet: S16 Table
S16 Table: Human pathogenic and non-pathogenic bacteria with completely TCS tolerant ENR homologues
S N	Organism	Pathogenicity	TCS tolerant ENR homologue*
1	Acinetobacter baumannii 1656-2	Humans	FabK
2	Acinetobacter baumannii AB0057	Humans	FabK
3	Acinetobacter baumannii AB307-0294	Humans	FabK
4	Acinetobacter baumannii ACICU	Humans	FabK
5	Acinetobacter baumannii AYE	Humans	FabK
6	Arcobacter butzleri RM4018	Humans	7-α-HSDH
7	Bacillus anthracis Ames	Humans	FabK
8	Bacillus cereus ATCC 10987	Humans	FabK
9	Bacteroides thetaiotaomicron VPI-5482	Humans	FabK
10	Bartonella bacilliformis KC583	Humans	FabK
11	Bartonella quintana RM-11	Humans	FabK
12	Brucella suis 1330	Humans	FabK
13	Burkholderia cenocepacia	Humans	FabK
14	Burkholderia mallei ATCC 23344	Humans	FabK
15	Burkholderia pseudomallei K96243	Humans	FabV
16	Burkholderia xenovorans	Humans	FabK
17	Campylobacter concisus 13826	Humans	FabK and 7-α-HSDH
18	Campylobacter curvus	Humans	FabK and 7-α-HSDH
19	Campylobacter fetus subsp. fetus 82-40	Humans	FabK and 7-α-HSDH
20	Capnocytophaga ochracea	Humans	FabK
21	Cronbacter sakazakii CMCC 45402	Humans	FabK
22	Enterococcus casseliflavus	Humans	FabK
23	Francisella tularensis subsp. holarctica OSU18	Humans	FabK
24	Helicobacter canadensis	Humans	7-α-HSDH
25	Helicobacter pylori 2017	Humans	7-α-HSDH
26	Helicobacter pylori 2018	Humans	7-α-HSDH
27	Helicobacter pylori 26695	Humans	7-α-HSDH
28	Helicobacter pylori 26695	Humans	7-α-HSDH
29	Helicobacter pylori 35A	Humans	7-α-HSDH
30	Helicobacter pylori 52	Humans	7-α-HSDH
31	Helicobacter pylori 83	Humans	7-α-HSDH
32	Helicobacter pylori 908	Humans	7-α-HSDH
33	Helicobacter pylori Aklavik117	Humans	7-α-HSDH
34	Helicobacter pylori B38	Humans	7-α-HSDH
35	Helicobacter pylori Cuz20	Humans	7-α-HSDH
36	Helicobacter pylori ELS37	Humans	7-α-HSDH
37	Helicobacter pylori F16	Humans	7-α-HSDH
38	Helicobacter pylori F30	Humans	7-α-HSDH
39	Helicobacter pylori F32	Humans	7-α-HSDH
40	Helicobacter pylori F57	Humans	7-α-HSDH
41	Helicobacter pylori G27	Humans	7-α-HSDH
42	Helicobacter pylori Gambia94/24	Humans	7-α-HSDH
43	Helicobacter pylori HUP-B14	Humans	7-α-HSDH
44	Helicobacter pylori India7	Humans	7-α-HSDH
45	Helicobacter pylori J99	Humans	7-α-HSDH
46	Helicobacter pylori Lithuania75	Humans	7-α-HSDH
47	Helicobacter pylori P12	Humans	7-α-HSDH
48	Helicobacter pylori PeCan18	Humans	7-α-HSDH
49	Helicobacter pylori PeCan4	Humans	7-α-HSDH
50	Helicobacter pylori PuN120	Humans	7-α-HSDH
51	Helicobacter pylori PuN135	Humans	7-α-HSDH
52	Helicobacter pylori Rif1	Humans	7-α-HSDH
53	Helicobacter pylori Rif2	Humans	7-α-HSDH
54	Helicobacter pylori Sat464	Humans	7-α-HSDH
55	Helicobacter pylori Shi112	Humans	7-α-HSDH
56	Helicobacter pylori Shi169	Humans	7-α-HSDH
57	Helicobacter pylori Shi417	Humans	7-α-HSDH
58	Helicobacter pylori SJM180	Humans	7-α-HSDH
59	Helicobacter pylori SNT49	Humans	7-α-HSDH
60	Helicobacter pylori SouthAfrica7	Humans	7-α-HSDH
61	Helicobacter pylori v225d	Humans	7-α-HSDH
62	Helicobacter pylori XZ274	Humans	7-α-HSDH
63	Lactobacillus brevis ATCC 367	Normal flora	FabK and FabV
64	Lactobacillus salivarius UCC118	Normal flora	FabK
65	Laribacter hongkongensis	Human	FabK
66	Legionella longbeachae NSW150	Human	FabK
67	Neisseria gonorrhoeae FA 1090	Humans	FabK
68	Neisseria meningitidis 053442	Humans	FabK
69	Nocardia farcinica IFM 10152	Humans	FabK
70	Prevotella	Humans	FabK
71	Propionibacterium avidum 44067	Humans	FabK
72	Pseudomonas aeruginosa PAO1	Humans	FabK and FabV
73	Rhodococcus equi 103S	Humans and animal	FabK
74	Shigella flexneri 2a 301	Humans	FabK
75	Staphylococcus epidermidis ATCC 12228	Humans	FabK
76	Staphylococcus epidermidis PM221	Human	FabK
77	Staphylococcus haemolyticus JCSC1435	Humans	FabK
78	Staphylococcus xylosus	Humans and animal	FabK
Symbols and abbreviations: *, Here only FabK ENR was considered either completely TCS tolerant or moderately TCS resistant, whereas all other ENRs were considered completely TCS tolerant.
